# Supplementary material for: Insights into Substrate Specificity of NlpC/P60 Cell Wall Hydrolases Containing Bacterial SH3 Domains
Source: PubMed Central journal article supplement — mBio. 2015 Sep 15;6(5):e02327-14. doi: 10.1128/mBio.02327-14 (PMC4600125; doi:10.1128/mbio.02327-14), 2015-09-15
Supplement: mbo004152460st1.pdf [file mbo004152460st1.pdf]

**Table S1.** Crystallization, data collection and refinement statistics

| <b>Crystallization and data collection</b>               |                                                               |                              |                                                 |                                                               |                              |                                                                        |
|----------------------------------------------------------|---------------------------------------------------------------|------------------------------|-------------------------------------------------|---------------------------------------------------------------|------------------------------|------------------------------------------------------------------------|
| Name/PDB ids                                             | DvLysin/3m1u                                                  |                              | BoYkfC/3npf                                     | BtYkfC/3pvq                                                   |                              | BtYkfC/4r0k                                                            |
| Space group                                              | P2 <sub>1</sub>                                               |                              | P2 <sub>1</sub> 2 <sub>1</sub> 2 <sub>1</sub>   | P2 <sub>1</sub>                                               |                              | P2 <sub>1</sub>                                                        |
| Unit cell                                                | $a=59.3, b=54.5, c=123.0 \text{ \AA}$ ,<br>$\beta=94.1^\circ$ |                              | $a=60.1,$<br>$b=62.5,$<br>$c=156.8 \text{ \AA}$ | $a=64.9, b=50.3, c=107.6 \text{ \AA}$ ,<br>$\beta=93.5^\circ$ |                              | $a=65.0,$<br>$b=50.6$<br>$c=107.9 \text{ \AA}$ ,<br>$\beta=93.7^\circ$ |
| Beamline                                                 | BL9-2                                                         |                              | SSRL 9-2                                        | ALS 8.2.2                                                     |                              | SSRL 12-2                                                              |
| Data                                                     | $\lambda_1$ MADSe-<br>inflection                              | $\lambda_2$ MADSe-<br>remote | $\lambda_1$ SADSe-<br>peak                      | $\lambda_1$ MADSe-<br>inflection                              | $\lambda_2$ MADSe-<br>remote | $\lambda_1$ SADSe-<br>remote                                           |
| Wavelength (Å)                                           | 0.97918                                                       | 0.91162                      | 0.97925                                         | 0.9796                                                        | 0.9537                       | 1.0000                                                                 |
| Resolution range (Å)                                     | 29.6-1.75                                                     | 29.6-1.75                    | 48.9-1.72                                       | 29.2-2.10                                                     | 29.2-2.10                    | 45.8-1.75                                                              |
| No. of observations                                      | 251,329                                                       | 252,636                      | 443,383                                         | 98,723                                                        | 99,008                       | 185,247                                                                |
| No. of unique reflections                                | 78,726                                                        | 78,779                       | 63,712                                          | 40,182                                                        | 40,250                       | 66,413                                                                 |
| Completeness (%) <sup>a</sup>                            | 99.4 (98.3)                                                   | 99.4 (98.4)                  | 100.0 (100.0)                                   | 98.6 (97.1)                                                   | 98.7 (97.2)                  | 94.0 (94.0)                                                            |
| Mean I/σ (I) <sup>a</sup>                                | 12.5 (2.6)                                                    | 15.6 (3.1)                   | 14.5 (2.6)                                      | 9.6 (2.3)                                                     | 9.2 (2.2)                    | 10.6 (2.1)                                                             |
| R <sub>merge</sub> on I <sup>a</sup> (%)                 | 8.7(51.9)                                                     | 6.3 (43.1)                   | 12.5 (74.7)                                     | 10.30 (44.0)                                                  | 11.0 (46.3)                  | 6.0 (40.6)                                                             |
| R <sub>meas</sub> on I <sup>a</sup> (%)                  | 10.5 (62.7)                                                   | 7.6 (52.1)                   | 13.5 (81.2)                                     | 13.1 (56.2)                                                   | 14.0 (59.1)                  | 7.3 (51.9)                                                             |
| R <sub>pim</sub> on I <sup>a</sup> (%)                   | 5.9 (34.9)                                                    | 4.2 (28.8)                   | 5.0 (31.5)                                      | 8.1 (34.5)                                                    | 8.6 (36.3)                   | 4.1 (32.1)                                                             |
| Highest resolution shell                                 | 1.84-1.75                                                     | 1.84-1.75                    | 1.81-1.72                                       | 2.21-2.10                                                     | 2.21-2.10                    | 1.84-1.75                                                              |
| <b>Model and refinement statistics</b>                   |                                                               |                              |                                                 |                                                               |                              |                                                                        |
| No. of reflections (total)                               |                                                               | 78,760                       | 63,635                                          |                                                               | 40,234                       | 66,391                                                                 |
| No. of reflections (test)                                |                                                               | 3951                         | 2823                                            |                                                               | 2019                         | 3280                                                                   |
| R <sub>cryst</sub> (%)                                   |                                                               | 13.9                         | 14.1                                            |                                                               | 16.5                         | 15.4                                                                   |
| R <sub>free</sub> (%)                                    |                                                               | 17.3                         | 17.1                                            |                                                               | 19.8                         | 17.7                                                                   |
| <b>Stereochemical parameters</b>                         |                                                               |                              |                                                 |                                                               |                              |                                                                        |
| Rmsd bond lengths (Å)                                    |                                                               | 0.015                        | 0.015                                           |                                                               | 0.010                        | 0.010                                                                  |
| Rmsd bond angles (°)                                     |                                                               | 1.50                         | 1.46                                            |                                                               | 1.03                         | 0.96                                                                   |
| MolProbity score                                         |                                                               |                              |                                                 |                                                               |                              |                                                                        |
| All atom clash score                                     |                                                               | 2.8                          | 1.9                                             |                                                               | 2.1                          | 1.2                                                                    |
| Ramachandran plot (%) <sup>b</sup>                       |                                                               | 97.8 (0)                     | 98.2 (0)                                        |                                                               | 99.2 (0)                     | 99.0 (0)                                                               |
| Rotamer outliers (%)                                     |                                                               | 1.2                          | 0.6                                             |                                                               | 1.0                          | 0.6                                                                    |
| Average isotropic B-value (Å <sup>2</sup> ) <sup>c</sup> |                                                               | 20.8 (20.3)                  | 18.5 (16.4)                                     |                                                               | 30.6 (21.8)                  | 31.6 (23.0)                                                            |
| ESU based on R <sub>free</sub> (Å)                       |                                                               | 0.10                         | 0.092                                           |                                                               | 0.16                         | 0.092                                                                  |
| No. of protein residues /<br>chains in ASU               |                                                               | 845/2                        | 602/2                                           |                                                               | 594/2                        | 607/2                                                                  |
| Non-protein entities <sup>d</sup>                        |                                                               | 965                          | 799                                             |                                                               | 455                          | 579                                                                    |

<sup>a</sup>Highest resolution shell in brackets.

<sup>b</sup>Percentage of residues in favored regions of Ramachandran plot (no. of outliers in brackets).

<sup>c</sup>This value represents the total B that includes TLS and residual B components (Wilson B-value in brackets).

<sup>d</sup>Non-protein entities include waters, cryoprotectants, components from the crystallization solutions, and other ions, such as chloride.

ESU = Estimated Standard Uncertainty in coordinates.

$$R_{\text{merge}} = \frac{\sum_{\text{hkl}} \sum_i |I_i(\text{hkl}) - \langle I(\text{hkl}) \rangle|}{\sum_{\text{hkl}} \sum_i I_i(\text{hkl})}$$

$$R_{\text{meas}} (\text{redundancy-independent } R_{\text{merge}}) = \frac{\sum_{\text{hkl}} [N_{\text{hkl}} / (N_{\text{hkl}} - 1)]^{1/2} \sum_i |I_i(\text{hkl}) - \langle I(\text{hkl}) \rangle|}{\sum_{\text{hkl}} \sum_i I_i(\text{hkl})}$$

$$R_{\text{pim}} (\text{precision-indicating } R_{\text{merge}}) = \frac{\sum_{\text{hkl}} [1 / (N_{\text{hkl}} - 1)]^{1/2} \sum_i |I_i(\text{hkl}) - \langle I(\text{hkl}) \rangle|}{\sum_{\text{hkl}} \sum_i I_i(\text{hkl})}$$

$$R_{\text{cryst}} = \frac{\sum |F_{\text{obs}}| - |F_{\text{calc}}|}{\sum |F_{\text{obs}}|}, \text{ where } F_{\text{calc}} \text{ and } F_{\text{obs}} \text{ are the calculated and observed structure factor amplitudes, respectively.}$$

R<sub>free</sub> = as for R<sub>cryst</sub>, but for 5.0% of the total reflections chosen at random and omitted from refinement.
