# Supplementary material for: Insights into Substrate Specificity of NlpC/P60 Cell Wall Hydrolases Containing Bacterial SH3 Domains
Source: PubMed Central journal article supplement — mBio. 2015 Sep 15;6(5):e02327-14. doi: 10.1128/mBio.02327-14 (PMC4600125; doi:10.1128/mbio.02327-14), 2015-09-15
Supplement: mbo004152460st2.pdf [file mbo004152460st2.pdf]

**Table S2. HPLC retention times of compounds tested in this work**

| DvLysin/YkfC substrate                       | HPLC conditions (a) | Retention time (min) | Corresponding products                                                                                  | Retention time (min) <sup>(a)</sup> |
|----------------------------------------------|---------------------|----------------------|---------------------------------------------------------------------------------------------------------|-------------------------------------|
| GlcNAc-1,6-anhydro-MurNAc-tetrapeptide (TCT) | A                   | 32                   | - GlcNAc-anhydro-MurNAc-L-Ala-D-Glu<br>- Dipeptide A <sub>2</sub> pm-D-Ala                              | 37<br>7                             |
| TCT dimer                                    | A                   | 45                   | - GlcNAc-anhydro-MurNAc-L-Ala-D-Glu<br>- Tetrapeptide A <sub>2</sub> pm(-D-Ala)-D-Ala-A <sub>2</sub> pm | 37<br>9.5                           |
| GlcNAc-MurNAc-tetrapeptide                   | A                   | 21/24 <sup>(b)</sup> | - GlcNAc-MurNAc-L-Ala-D-Glu<br>- Dipeptide A <sub>2</sub> pm-D-Ala                                      | 22/27 <sup>(b)</sup><br>7           |
| Dimer of GlcNAc-MurNAc-tetrapeptide          | A                   | 31/34                | - GlcNAc-MurNAc-L-Ala-D-Glu<br>- Tetrapeptide A <sub>2</sub> pm(-D-Ala)-D-Ala-A <sub>2</sub> pm         | 22/27<br>9.5                        |
| anhMurNAc-tetrapeptide                       | A                   | 27                   | - anhydro-MurNAc-L-Ala-D-Glu<br>- Dipeptide A <sub>2</sub> pm-D-Ala                                     | 33<br>7                             |
| MurNAc-pentapeptide                          | A                   | 18.5/22.5            | - MurNAc-L-Ala-D-Glu<br>- Tripeptide A <sub>2</sub> pm-D-Ala-D-Ala                                      | 19/23<br>9                          |
| MurNAc-tetrapeptide                          | A                   | 17/21                | - MurNAc-L-Ala-D-Glu<br>- Dipeptide A <sub>2</sub> pm-D-Ala                                             | 19/23<br>7                          |
| MurNAc-tripeptide                            | A                   | 15/18                | - MurNAc-L-Ala-D-Glu<br>- A <sub>2</sub> pm                                                             | 19/23<br>5                          |
| MurNAc-tripeptide(Lys)                       | A                   | 16.5/20              | - MurNAc-L-Ala-D-Glu<br>- Lys                                                                           | 19/23<br>5                          |
| UDP-MurNAc-tripeptide                        | A without gradient  | 18                   | - UDP-MurNAc-L-Ala-D-Glu<br>- A <sub>2</sub> pm                                                         | 30<br>5                             |
| Pentapeptide                                 | B                   | 22                   | - Dipeptide L-Ala-D-Glu<br>- Tripeptide A <sub>2</sub> pm-D-Ala-D-Ala                                   | 13.5<br>11.5                        |
| Pentapeptide(Lys)                            | B                   | 32                   | - Dipeptide L-Ala-D-Glu<br>- Tripeptide L-Lys-D-Ala-D-Ala                                               | 13.5<br>15.5                        |
| Tetrapeptide                                 | B                   | 17.5                 | - Dipeptide L-Ala-D-Glu<br>- Dipeptide A <sub>2</sub> pm-D-Ala                                          | 13.5<br>9.5                         |
| Tripeptide                                   | B                   | 12.5                 | - Dipeptide L-Ala-D-Glu<br>- A <sub>2</sub> pm                                                          | 13.5<br>5                           |
| Lactoyl-pentapeptide                         | A without gradient  | 27                   | - Lactoyl-L-Ala-D-Glu<br>- Tripeptide A <sub>2</sub> pm-D-Ala-D-Ala                                     | 19.5<br>9                           |

<sup>(a)</sup>HPLC conditions:

A: Nucleosyl 100 5  $\mu$  C18 (250  $\times$  4.6 mm); Elution with 50 mM sodium phosphate, pH 4.5, and application of a linear gradient of MeOH (from 0 to 25%) between 0 and 40 min, at a flow rate of 0.6 ml/min; detection at 207 nm or 262 nm.

B: ODS-Hypersil 3  $\mu$  C18 (250  $\times$  4.6 mm); Elution with 0.05% TFA containing or not 5% methanol, at a flow rate of 0.6 ml/min; detection at 207 nm.

<sup>(b)</sup>Two peaks corresponding to the  $\alpha$  and  $\beta$  anomers were observed for compounds having a reducing MurNAc group.
